# Supplementary material for: Minor perturbations of thyroid homeostasis and major cardiovascular endpoints—Physiological mechanisms and clinical evidence
Source: PubMed Central journal article supplement (PMC9420854; doi:10.3389/fcvm.2022.942971), 2022-08-15

## Supplementary material accompanying the publication "Minor Perturbations of Thyroid Homeostasis and Major Cardiovascular Endpoints – Physiological Mechanisms and Clinical Evidence"

Patrick Müller, Melvin Khee-Shing Leow, Johannes W. Dietrich\*

\* Correspondence: Corresponding Author: johannes.dietrich@ruhr-uni-bochum.de

**Supplementary table 1:** Newcastle-Ottawa scores of included studies

| Author           | Year | S1 | S2 | S3 | S4 | C1 | O1 | O2 | O3 | NOS |
|------------------|------|----|----|----|----|----|----|----|----|-----|
| Cappola et al.   | 2006 | 1  | 1  | 1  | 1  | 1  | 1  | 1  | 1  | 8   |
| Chaker et al.    | 2016 | 1  | 1  | 1  | 1  | 1  | 1  | 1  | 1  | 8   |
| Drechsler et al. | 2014 | 1  | 1  | 1  | 1  | 1  | 1  | 1  | 1  | 8   |
| Groothof et al.  | 2021 | 1  | 1  | 1  | 1  | 1  | 1  | 1  | 1  | 8   |
| Gussekloo et al. | 2004 | 1  | 1  | 1  | 1  | 1  | 1  | 1  | 1  | 8   |
| Iervasi et al.   | 2007 | 1  | 1  | 1  | 1  | 1  | 1  | 1  | 1  | 8   |
| Ittermann et al. | 2010 | 1  | 1  | 1  | 1  | 1  | 1  | 1  | 1  | 8   |
| Kannan et al.    | 2018 | 1  | 1  | 1  | 1  | 1  | 1  | 1  | 1  | 8   |
| Kim et al.       | 2020 | 0  | 1  | 1  | 1  | 1  | 1  | 1  | 1  | 7   |
| Langén et al.    | 2018 | 1  | 1  | 1  | 1  | 1  | 1  | 1  | 1  | 8   |
| Müller et al.    | 2020 | 0  | 1  | 1  | 1  | 1  | 1  | 1  | 1  | 7   |
| Pearce et al.    | 2016 | 1  | 1  | 1  | 1  | 1  | 1  | 1  | 1  | 8   |
| Rodondi et al.   | 2005 | 1  | 1  | 1  | 1  | 1  | 1  | 1  | 1  | 8   |
| Schultz et al.   | 2011 | 1  | 1  | 1  | 1  | 1  | 1  | 1  | 1  | 8   |
| Selmer et al.    | 2014 | 1  | 1  | 1  | 1  | 0  | 1  | 1  | 1  | 7   |
| Sgarbi et al.    | 2010 | 1  | 1  | 1  | 1  | 1  | 1  | 1  | 1  | 8   |
| Walsh et al.     | 2005 | 1  | 1  | 1  | 1  | 1  | 1  | 1  | 1  | 8   |
| Yang et al.      | 2020 | 0  | 1  | 1  | 1  | 1  | 1  | 1  | 0  | 5   |

  

|                                                                    |                                                                  |                                                    |                                                                           |                                    |                       |                        |                        |
|--------------------------------------------------------------------|------------------------------------------------------------------|----------------------------------------------------|---------------------------------------------------------------------------|------------------------------------|-----------------------|------------------------|------------------------|
| Case definition adequate?<br>Representativeness of exposed cohort? | Representativeness of cases?<br>Selection of non-exposed cohort? | Selection of controls<br>Ascertainment of exposure | Definition of controls<br>Demonstration that outcome not present at start | Comparability of cases and control | Assessment of outcome | Follow-up long enough? | Adequacy of follow-up? |
|--------------------------------------------------------------------|------------------------------------------------------------------|----------------------------------------------------|---------------------------------------------------------------------------|------------------------------------|-----------------------|------------------------|------------------------|

**Supplementary figure 1:** Numbers of studies included in the meta-analyses with respect to different end-point criteria. Inclusive MACE: CVD or other major endpoints.

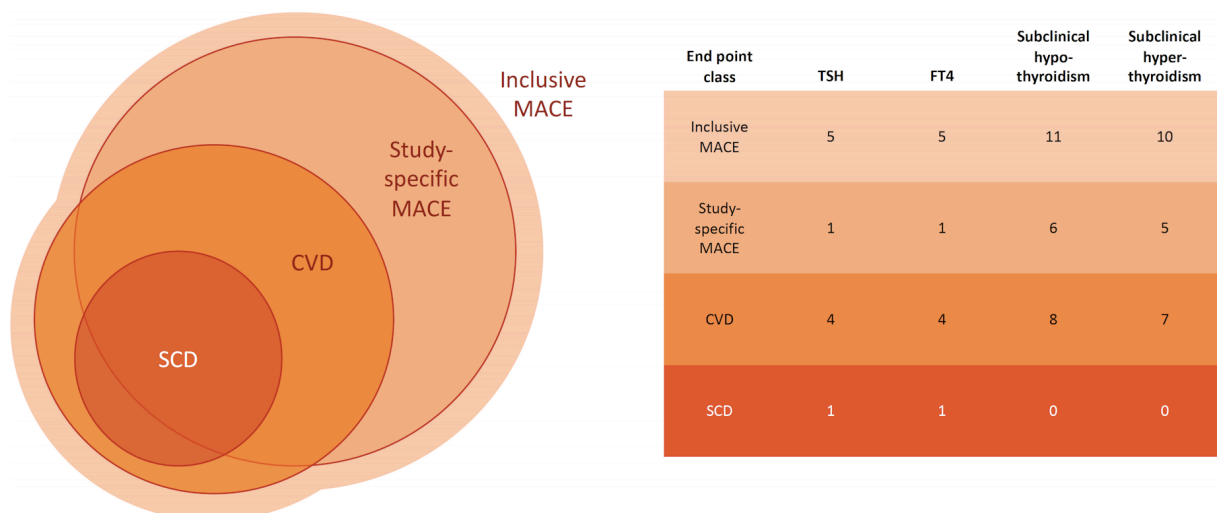

**Supplementary figure 2:** Funnel plots of meta-analyses with five or more studies

**A:** Inclusive MACE ~ TSH concentration:

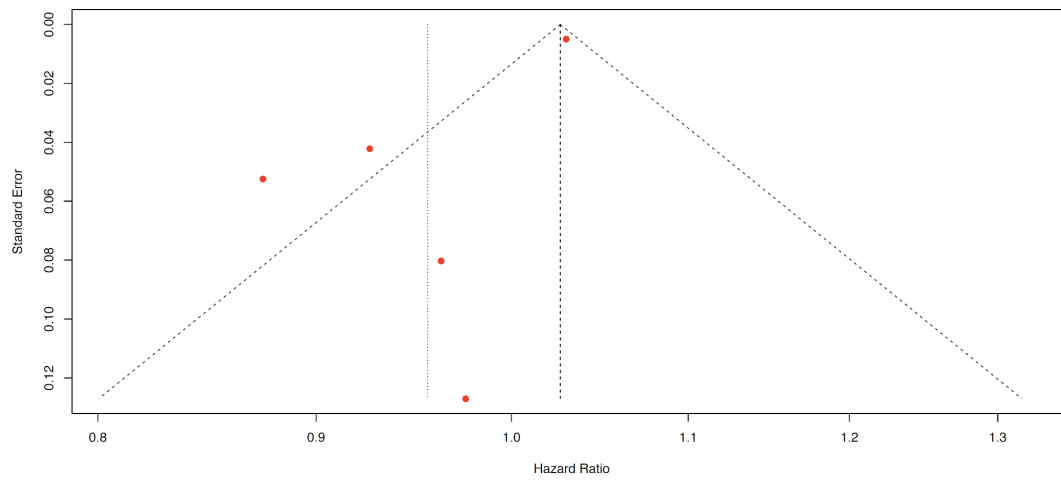

**B:** Inclusive MACE ~ FT4 concentration:

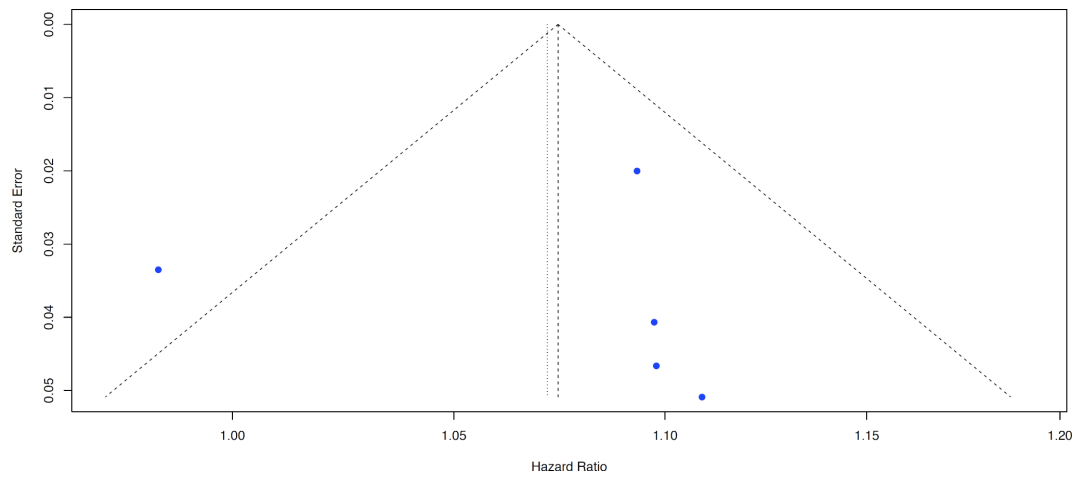

**C:** Inclusive MACE ~ Subclinical hypothyroidism:

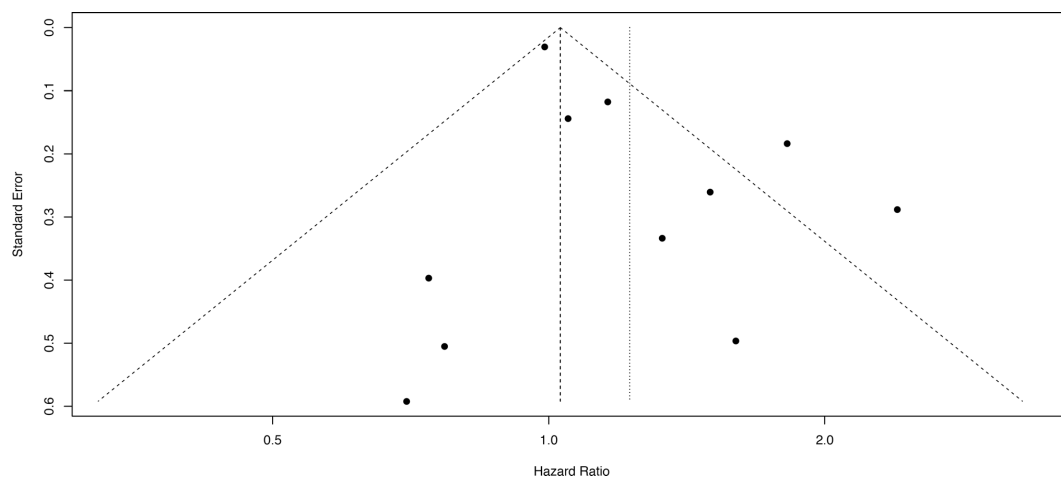

**D: Study-specific MACE ~ Subclinical hypothyroidism:**

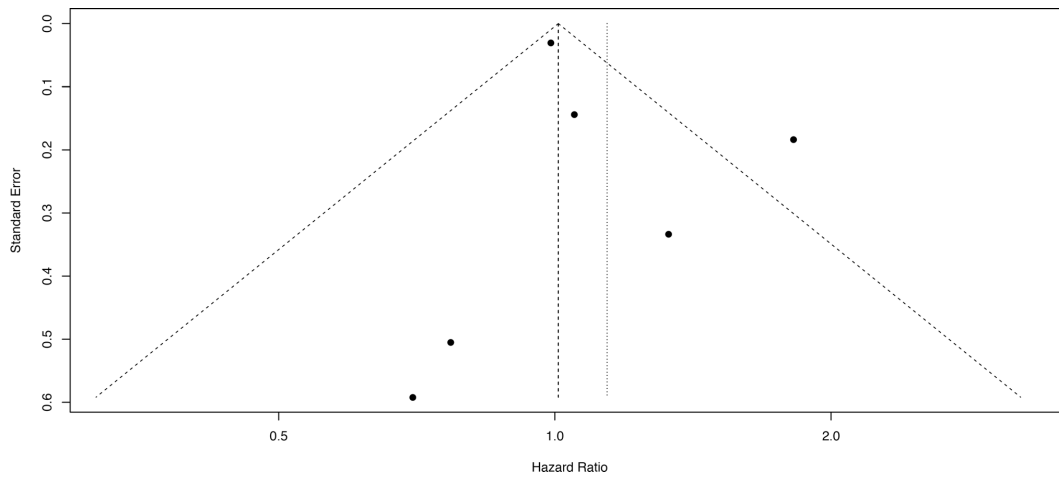

**E: CVD ~ Subclinical hypothyroidism:**

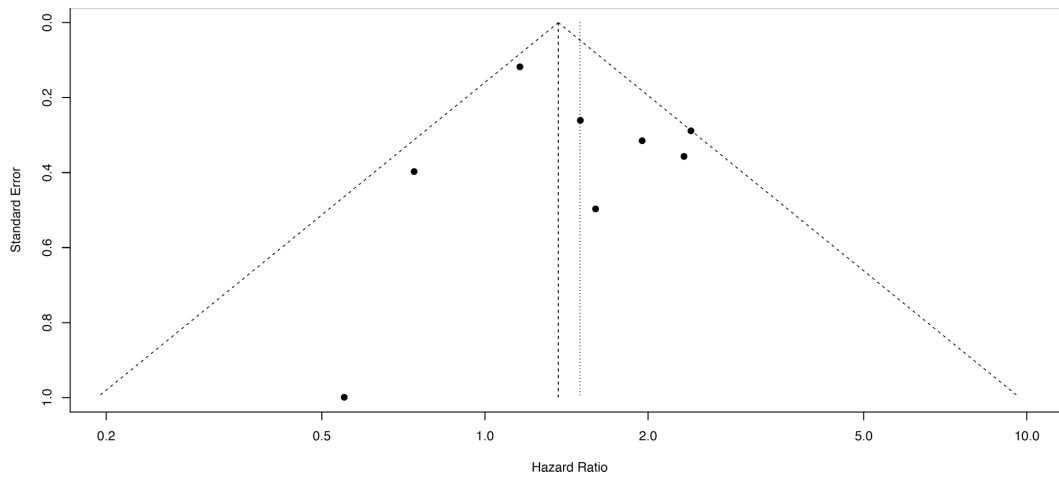

**C: Inclusive MACE ~ Subclinical hyperthyroidism:**

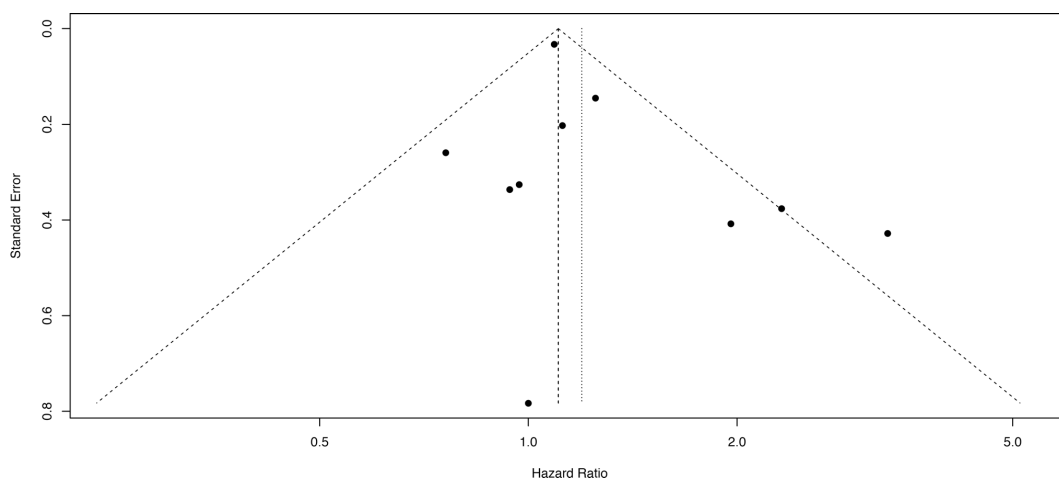

D: Study-specific MACE ~ Subclinical hyperthyroidism:

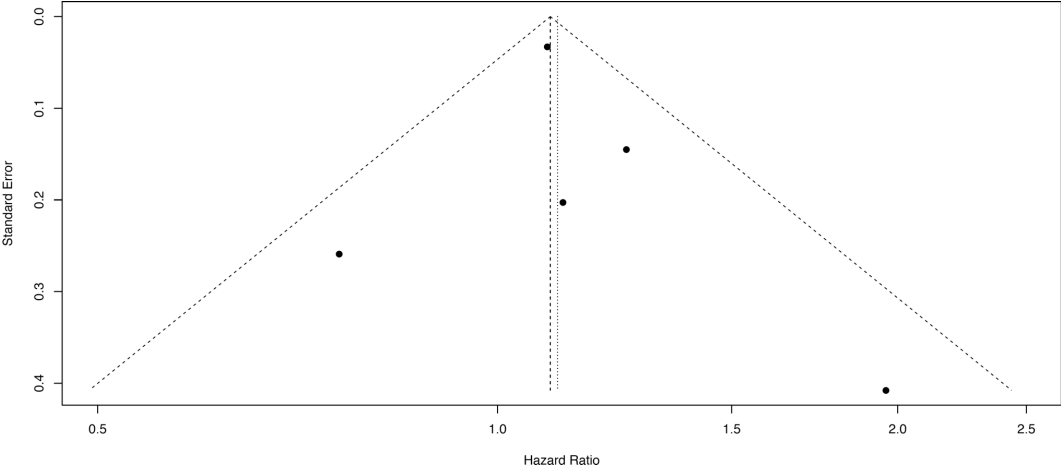

E: CVD ~ Subclinical hyperthyroidism:

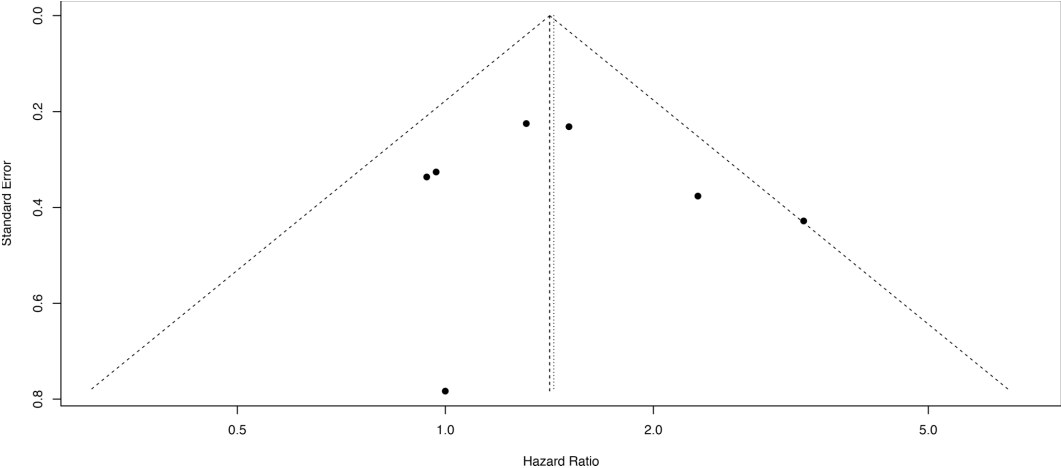

Supplement: Data_Sheet_1.pdf [file Data_Sheet_1.pdf]
